# Supplementary material
Source: publisher figshare collection journal article supplement (https://acs.figshare.com/ndownloader/files/4507078)
Supplement: Supplementary file 1 [file 4507078]

## Supporting Information

### A Non-metal Catalyst for Molecular Hydrogen Activation with Comparable Catalytic Hydrogenation Capability to Noble Metal Catalyst

Baojun Li, Zheng Xu\*

State Key Laboratory of Coordination Chemistry and Nanjing National Laboratory of Microstructure, School of Chemistry and Chemical Engineering, Nanjing University, Nanjing, 210093, P. R. China

E-mail: [zhengxu@netra.nju.edu.cn](mailto:zhengxu@netra.nju.edu.cn)

### Experimental Section

**Reagents:** C<sub>70</sub> was purchased from Henan yongxin chemical limited company, C<sub>60</sub> were purchased from Yongxin, Aldrich, Alfa-Aesar and TCI respectively, nitro compounds were purchased from Alfa-Aesar, other common reagents were purchased from Nanjing chemical limited company.

**Preparation of C<sub>60</sub> and C<sub>70</sub> mono anion catalysts:** Preparation of C<sub>60</sub> mono anion follows our previous work:<sup>[1,2]</sup> C<sub>60</sub> (36mg, 0.05mmol), Ni-Al alloy (130mg) and NaOH (400mg, 10mmol) were put into a flask, evacuated to exclude oxygen and filled with N<sub>2</sub> for three times, and then fresh-distilled tetrahydrofuran (THF, 20ml) was added in it with vigorous stirring. After adding as-distilled water (5ml), the reduction reaction took place rapidly and a red cloud-like C<sub>60</sub> mono anion product diffused into the THF layer whose color turned to dark red-purple very quickly. After 10 minutes, the dark red-purple THF solution of C<sub>60</sub> mono anion was separated from the aqueous solution. The fresh prepared THF solution of C<sub>60</sub> mono anion was used as catalyst for the hydrogenation of various substrates. C<sub>70</sub> monoanion was prepared by similar procedures. In the case of C<sub>60</sub><sup>2-</sup>, DMSO replaced THF as solvent. In order to inspect if the metal contaminants were introduced by the preparation procedures of fullerene anions or not, a blank solution was prepared by the similar procedure with that of fullerene anion except for absence of C<sub>60</sub>. The hydrogenation reaction of nitrobenzene in the blank solution was completed. No products of the hydrogenation reaction were observed, the result was listed in Table S2 (entry 9).

**Hydrogenation under light irradiation condition:** Hydrogenation of various substrates was carried out in a cylinder quartz reactor. For each reaction, substrate (1.000g), catalyst (0.036g, 0.050mmol) and THF (250ml) were added into the reactor and bubbled with N<sub>2</sub> for 2h to get rid of air, then bubbled H<sub>2</sub> for 0.5h to saturate H<sub>2</sub>. The hydrogenation reaction was performed with bubbled H<sub>2</sub> and stirring under light irradiation (high pressure mercury lamp, 300W or Xe lamp, 350W) for 4h. The reaction temperature is controlled at ~25°C by cycling cold water. The products and intermediates were identified on a GCMS-QP2010 (SHIMADZU) spectrometer equipped with a DB-ms capillary column comparing with authentic samples.

**Preparation of yield-time curves in Figure 1:** Substrate (1.000g), catalyst (0.036g, 0.050mmol) and THF (250ml) were added into the cylinder quartz reactor and bubbled with nitrogen for 2h to get rid of air, then bubbled H<sub>2</sub> for 0.5h to saturate H<sub>2</sub>. The hydrogenation reaction was performed under UV irradiation (high pressure mercury lamp, 300W) with stirring and bubbled H<sub>2</sub> at ~25°C. The samples were acquired every 10 minutes for GCMS analysis. The conversion and selectivity are a little bit lower than that in Table 1 because the light irradiation and stirring were stopped during acquisitions of samples, which disturbed the reaction.

**Hydrogenation under dark condition:** The hydrogenation of various substrates was carried out in a 100ml stainless steel autoclave. For each reaction, substrate (1.000g), catalyst (0.036g, 0.050mmol) and THF (40ml) were added into the autoclave. The autoclave was flushed with hydrogen for three times to get rid of air. The hydrogenation reaction was performed under hydrogen atmosphere (5.0MPa) at 140°C and stirring at 900 r.p.m. for 3h. Then, the autoclave was cooled to the ambient temperature and flushed twice with nitrogen. The catalyst was separated by centrifugation at 12,000 r.p.m., washed with THF (3×5ml) for characterization. The identification of products and intermediates was done on a GCMS-QP2010 (SHIMADZU) spectrometer equipped with a DB-ms capillary column by comparing with authentic samples.

**Inductively Coupled Plasma (ICP) Emission Spectrometer analysis of fullerene:** Fullerene (100.0 mg) from various companies were put in the crucible and heated in a muffle furnace at 500°C under air to oxide all samples, then several drops of 6M HCl aqueous solution was added in the crucible to make a clear transparent solution, which was transferred into a 10ml of volumetric flask for ICP measurements.

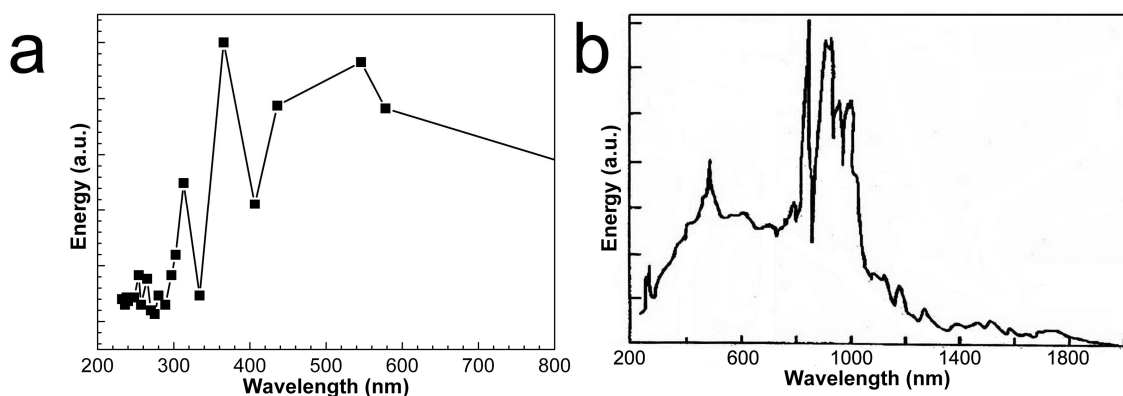

**Figure S1** The energy distribution of high pressure mercury lamp (300 W) (a) and Xe lamp (350 W) (b)

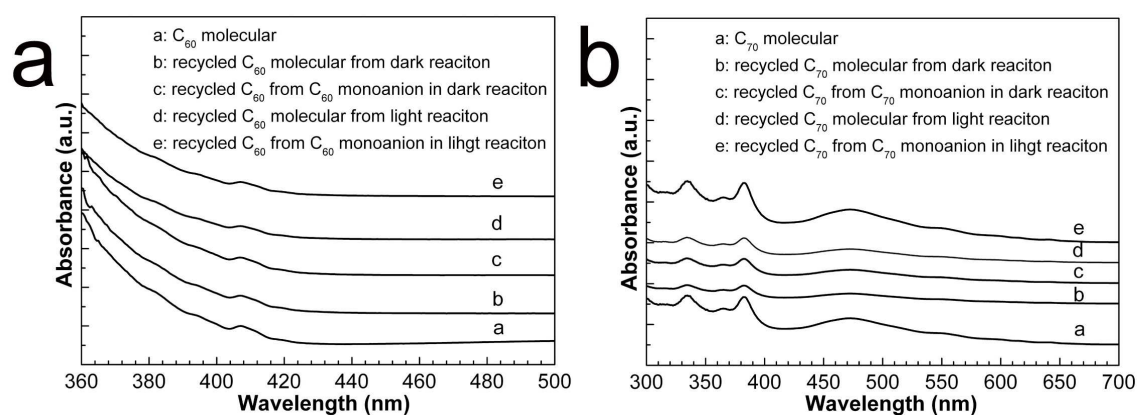

**Figure S2** The UV-Vis spectrum of recycled  $C_{60}$  (a) and  $C_{70}$  (b) catalysts in toluene solution.  $C_{60}^-$  and  $C_{70}^-$  are very sensitive to air and forms neutral  $C_{60}$  and  $C_{70}$  with a few oxides when recovering from reaction solution in open air.

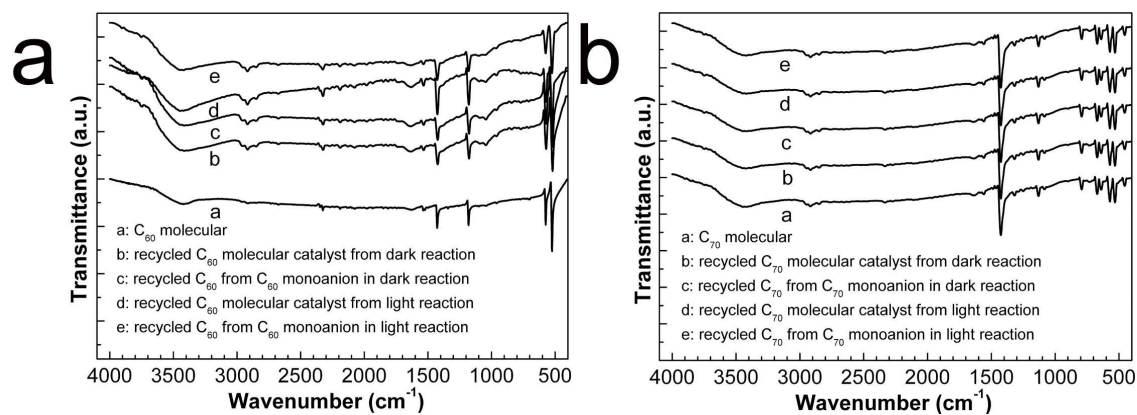

**Figure S3** The IR spectrum of recycled  $C_{60}$  (a) and  $C_{70}$  (b) catalysts from dark and light reactions.  $C_{60}^-$  and  $C_{70}^-$  are very sensitive to air and forms neutral  $C_{60}$  and  $C_{70}$  with a few oxides when recovering from reaction solution in open air.



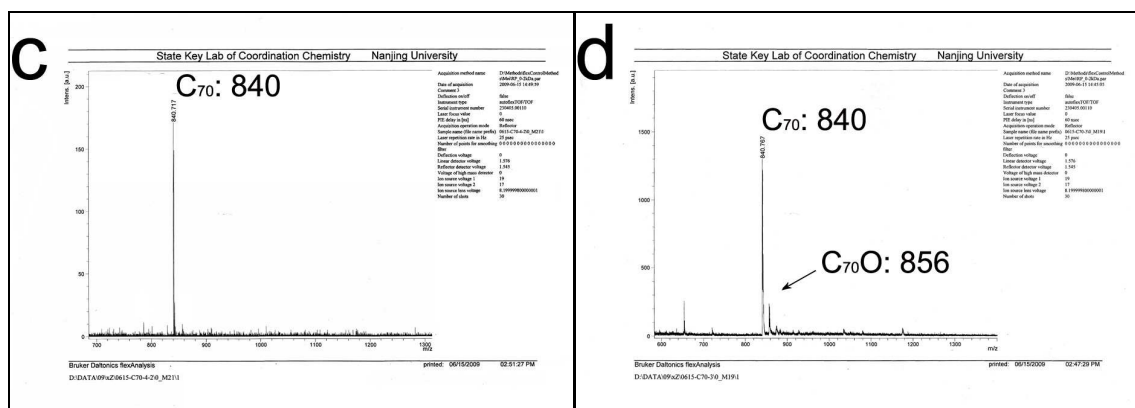

**Figure S5** The MALDI-TOF of recycled  $C_{70}$  from  $C_{70}$  catalyst in dark (a) and light (c) reaction and from  $C_{70}^-$  catalyst in dark (b) and light (d) reaction.  $C_{70}^-$  is very sensitive to air and forms neutral  $C_{70}$  with a few oxides when recovering from reaction solution in open air.

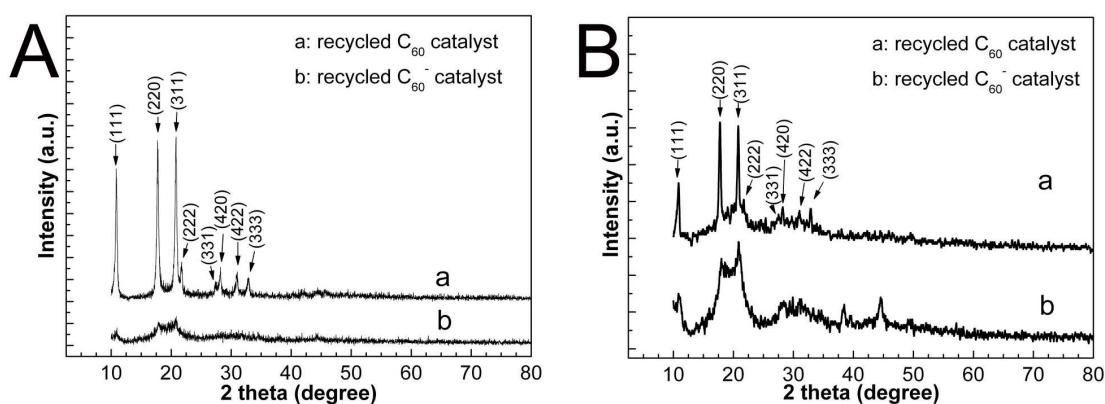

**Figure S6** The XRD pattern of recycled  $C_{60}$  (curve a) and  $C_{60}^-$  (curve b) catalysts from dark (A) and light irradiation (B) reactions.  $C_{60}^-$  is very sensitive to air and forms neutral  $C_{60}$  with a few oxides when recovering from reaction solution. The sample recovered is directly used for XRD without recrystallisation. The crystallinity of recovered sample depends on the recovering conditions.

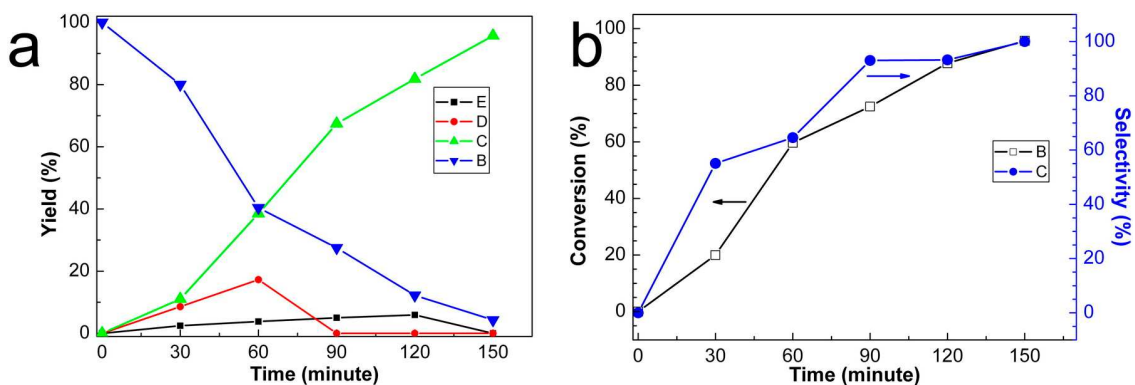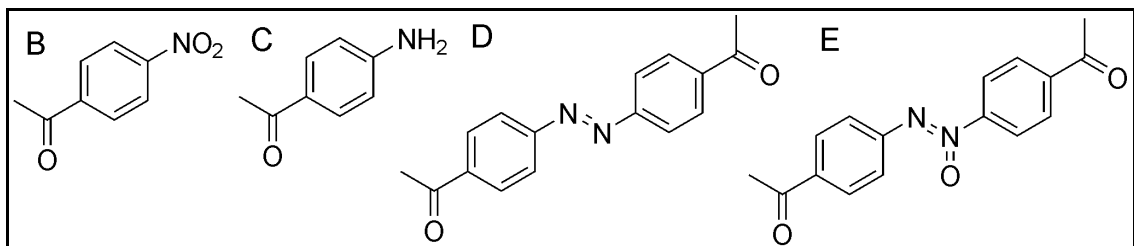

**Figure S7** The plot of product distribution (a) and conversion and selectivity (b) vs. time in hydrogenation of 4-nitroacetophenone with  $C_{60}$  catalyst excited by ultraviolet radiation, Reaction conditions: 1.0 g substrate, 0.036 g catalyst and 250 mL THF solvent.

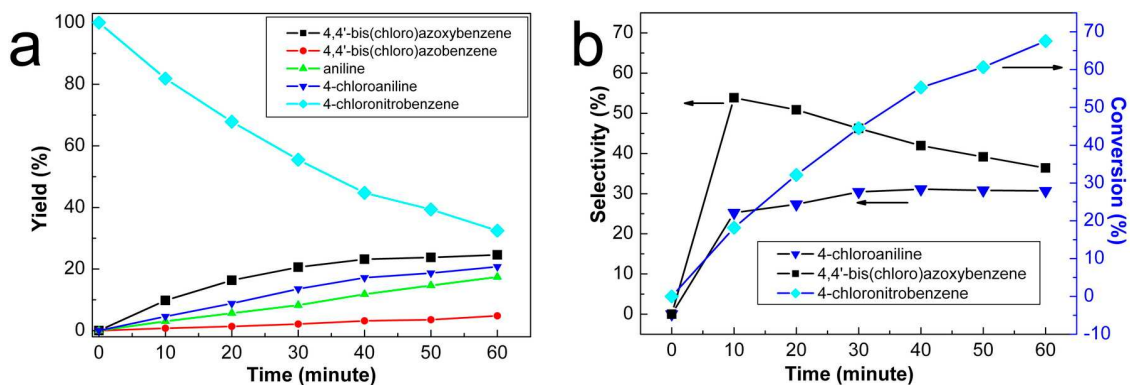

**Figure S8** The plot of product distribution (a) and conversion and selectivity (b) vs. time in hydrogenation of 4-chloronitrobenzene with  $C_{60}$  catalyst excited by ultraviolet radiation, Reaction conditions: 1.0 g substrate, 0.036 g catalyst and 250 mL THF solvent.

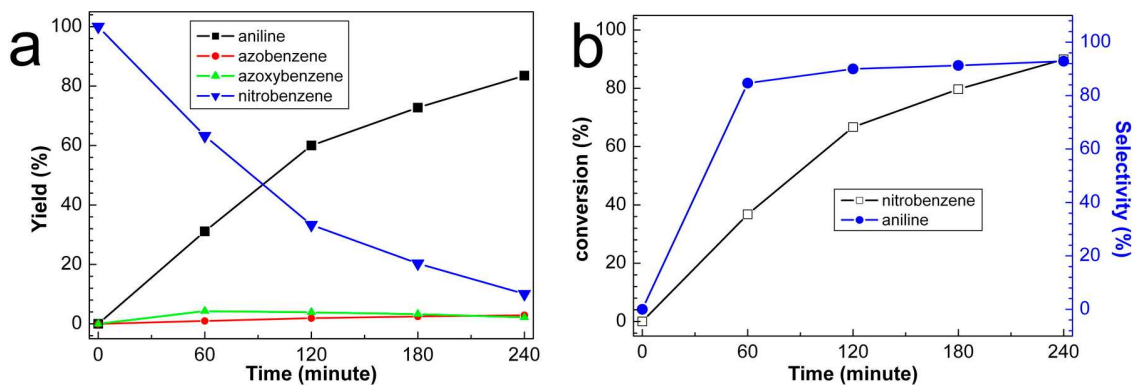

**Figure S9** The plot of product distribution (a) and conversion and selectivity (b) vs. time in hydrogenation of nitrobenzene with  $C_{70}$  catalyst excited by ultraviolet radiation, Reaction conditions: 1.0 g substrate, 0.036 g catalyst and 250 mL THF solvent.

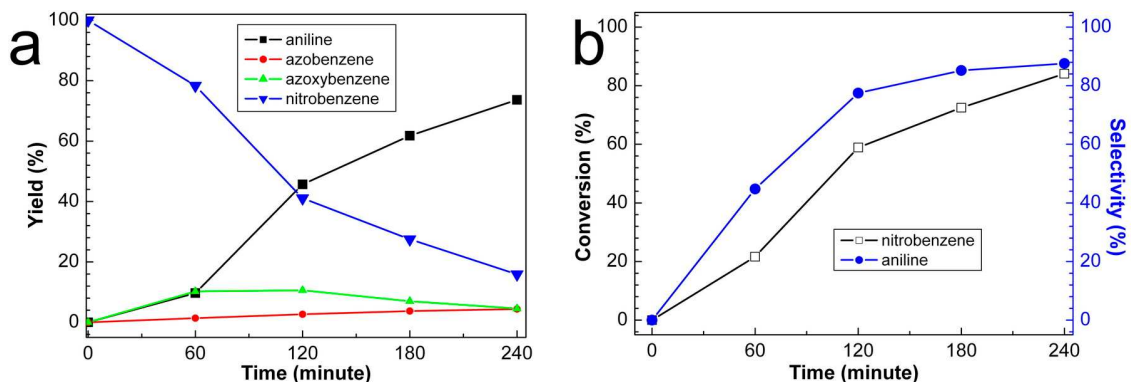

**Figure S10** The plot of product distribution (a) and conversion and selectivity (b) vs. time in hydrogenation of nitrobenzene with  $C_{70}$  catalyst excited by ultraviolet radiation, Reaction conditions: 1.0 g substrate, 0.036 g catalyst and 250 mL THF solvent.

**Table S1.** The hydrogenation of nitrobenzene to aniline under light irradiation with various fullerene catalysts<sup>[a]</sup>.

| Entry             | Catalyst                                              | Light Radiation | t (h) | Conv. (%) | Select. (%) |
|-------------------|-------------------------------------------------------|-----------------|-------|-----------|-------------|
| 1                 | C <sub>60</sub> (Aldrich)                             | UV              | 1.0   | 85.7      | 75.2        |
| 2                 | C <sub>60</sub> (Aldrich)                             | UV              | 4.0   | 94.7      | 86.7        |
| 3                 | C <sub>60</sub> (Alfa-Aesar)                          | UV              | 1.0   | 84.9      | 74.1        |
| 4                 | C <sub>60</sub> (Alfa-Aesar)                          | UV              | 4.0   | 96.1      | 88.5        |
| 5                 | C <sub>60</sub> (TCI)                                 | UV              | 1.0   | 85.1      | 74.8        |
| 6                 | C <sub>60</sub> (TCI)                                 | UV              | 4.0   | 97.4      | 88.2        |
| 7 <sup>[b]</sup>  | Fe <sup>3+</sup> (Fe(NO <sub>3</sub> ) <sub>3</sub> ) | UV              | 1.0   | 0         | ~           |
| 8 <sup>[b]</sup>  | Co <sup>2+</sup> (Co(NO <sub>3</sub> ) <sub>2</sub> ) | UV              | 1.0   | 0         | ~           |
| 9 <sup>[b]</sup>  | Cr <sup>3+</sup> (Cr(NO <sub>3</sub> ) <sub>3</sub> ) | UV              | 1.0   | 0         | ~           |
| 10 <sup>[b]</sup> | Cu <sup>2+</sup> (Cu(NO <sub>3</sub> ) <sub>2</sub> ) | UV              | 1.0   | 0         | ~           |
| 11 <sup>[b]</sup> | Ag <sup>+</sup> (AgNO <sub>3</sub> )                  | UV              | 1.0   | 0         | ~           |

[a] Reaction conditions: 1.0g substrate, 0.036g catalyst and 250ml THF solvent under 1 atmospheric pressure of H<sub>2</sub> and light irradiation (300W high pressure Hg lamps) in a cylinder quartz reactor. [b] 100 ppm of metal ion (25×10<sup>3</sup>μg) in reaction mixture (250ml) respectively and the amount of metal ions added is ~10<sup>4</sup> times higher than that of 0.036g C<sub>60</sub> in 250ml THF in order to see their catalytic behavior clearly.

**Table S2.** The hydrogenation of nitrobenzene to aniline with various C<sub>60</sub> catalysts under dark condition<sup>[a]</sup>.

| Entry            | Catalyst                                              | H <sub>2</sub> (MPa) | T (°C) | Conv. (%) | Select. (%) |
|------------------|-------------------------------------------------------|----------------------|--------|-----------|-------------|
| 1                | C <sub>60</sub> <sup>-</sup> (Aldrich)                | 5.0                  | 140    | 95.6      | 71.9        |
| 2                | C <sub>60</sub> <sup>-</sup> (Alfa-Aesar)             | 5.0                  | 140    | 93.1      | 73.4        |
| 3                | C <sub>60</sub> <sup>-</sup> (TCI)                    | 5.0                  | 140    | 96.6      | 72.8        |
| 4 <sup>[b]</sup> | Fe <sup>3+</sup> (Fe(NO <sub>3</sub> ) <sub>3</sub> ) | 5.0                  | 140    | 0         | ~           |
| 5 <sup>[b]</sup> | Co <sup>2+</sup> (Co(NO <sub>3</sub> ) <sub>2</sub> ) | 5.0                  | 140    | 0         | ~           |
| 6 <sup>[b]</sup> | Cr <sup>3+</sup> (Cr(NO <sub>3</sub> ) <sub>3</sub> ) | 5.0                  | 140    | 0         | ~           |
| 7 <sup>[b]</sup> | Cu <sup>2+</sup> (Cu(NO <sub>3</sub> ) <sub>2</sub> ) | 5.0                  | 140    | 0         | ~           |
| 8 <sup>[b]</sup> | Ag <sup>+</sup> (AgNO <sub>3</sub> )                  | 5.0                  | 140    | 0         | ~           |
| 9 <sup>[c]</sup> | Blank solution                                        | 5.0                  | 140    | 0         | ~           |

[a] Reaction conditions: 1.0g substrate, 0.036g catalyst and 40ml THF solvent for 4.0h. [b] 0.1 ppm of metal ion (4.1 μg) in reaction mixture (41 ml), which is ~10<sup>2</sup> times higher than that of 0.036g C<sub>60</sub> in 41ml THF. [c] blank solution was prepared by the similar procedure with that of C<sub>60</sub><sup>-</sup> except for absence of C<sub>60</sub>.

**Table S3.** ICP results of for metal contaminants contained in C<sub>60</sub> from various companies<sup>[a]</sup> (μg/g).

| Engtry | Catalyst                     | Co/ppm           | Cr/ppm | Cu/ppm | Fe/ppm | Ag/ppm | Pd/ppm           | Pt/ppm           | Ni/ppm           |
|--------|------------------------------|------------------|--------|--------|--------|--------|------------------|------------------|------------------|
| 1      | C <sub>60</sub> (Yongxin)    | ~ <sup>[b]</sup> | 2.7    | 2.4    | 63.8   | 3.8    | ~ <sup>[b]</sup> | ~ <sup>[b]</sup> | ~ <sup>[b]</sup> |
| 2      | C <sub>60</sub> (Aldrich)    | 0.1              | 0.6    | 2.3    | 36.1   | 0.3    | ~ <sup>[b]</sup> | ~ <sup>[b]</sup> | ~ <sup>[b]</sup> |
| 3      | C <sub>60</sub> (Alfa-Aesar) | 0.2              | 1.1    | 8.9    | 67.4   | 0.6    | ~ <sup>[b]</sup> | ~ <sup>[b]</sup> | ~ <sup>[b]</sup> |
| 4      | TCI                          | ~ <sup>[b]</sup> | 0.8    | 3.0    | 17.6   | 0.1    | ~ <sup>[b]</sup> | ~ <sup>[b]</sup> | ~ <sup>[b]</sup> |

[a] experimental conditions were listed in experimental section. [b] below the detecting limit.

## References

- (1) (a) Wu, M.; Wei, X.; Qi, L.; Xu, Z. *Tetrahedron Lett.* **1996**, 37, 7409-7412. (b) Wei, X.; Wu, M.; Qi, L.; Xu, Z. *J. Chem. Soc., Perkin Trans. 2*, **1997**, 1389-1393.
